# Supplementary material
Source: PubMed Central journal article supplement (PMC8579237)
Supplement: jama-e2117649-s001.pdf [file jama-e2117649-s001.pdf]

## Supplemental Online Content

Vaccarino V, Alumuwaqqat Z, Kim JH, et al. Association of mental stress–induced myocardial ischemia with cardiovascular events in patients with coronary heart disease. *JAMA*. doi:10.1001/jama.2021.17649

**eFigure 1.** Flow chart for cohort construction

**eFigure 2.** Distribution of first and subsequent events for each of the study endpoints

**eFigure 3.** Cumulative incidence of the secondary study endpoint (cardiovascular death, MI, or hospitalizations for heart failure)

**eFigure 4.** Pooled estimates and plots for the association of mental stress–induced myocardial ischemia with the secondary endpoint of cardiovascular death, MI, or hospitalizations for heart failure

**eFigure 5.** Cumulative incidence of secondary study endpoint (cardiovascular death, MI, or hospitalizations for heart failure) for separate ischemia phenotypes in the pooled sample

**eTable 1.** Association of ischemia provoked by mental stress and by conventional (pharmacological or exercise) stress with the primary study endpoint in the pooled sample

**eTable 2.** Association of ischemia phenotypes with the primary and the secondary endpoints in the pooled sample

This supplemental material has been provided by the authors to give readers additional information about their work.

## SUPPLEMENTAL MATERIAL

### Supplemental Figures and Tables.

#### eFigure 1

Flow chart for cohort construction.

#### eFigure 2

Distribution of first and subsequent events for each of the study endpoints in the two study populations, by mental stress-induced myocardial ischemia status.

#### eFigure 3.

Cumulative incidence of the secondary study endpoint (cardiovascular death, MI, or hospitalizations for heart failure) in each of the two study populations, by mental stress-induced myocardial ischemia status. Because of the repeated events analysis, patients were removed from the risk set at each timepoint only if they died or were censored. In the Mental Stress Ischemia Prognosis Study, the median observation period was 72.3 (interquartile range, 70.2-72.3) months in patients with mental stress ischemia, and 72.3 (interquartile range, 67.8-72.3) months in patients without mental stress ischemia. In the Myocardial Infarction and Mental Stress Study, the median observation period was 56.7 (interquartile range, 46.0-68.7) months in patients with mental stress ischemia, and 55.5 (interquartile range, 46.2-63.4) months in patients without mental stress ischemia.

#### eFigure 4

Pooled estimates and plots for the association of mental stress induced myocardial ischemia with the secondary endpoint of cardiovascular death, MI, or hospitalizations for heart failure, overall and in subgroups. The two study populations were pooled using individual patient data meta-analysis. For the overall sample, both unadjusted and fully adjusted estimates are shown. For the subgroups, the estimates shown are unadjusted.

#### eFigure 5

Cumulative incidence of the secondary study endpoint (cardiovascular death, MI, or hospitalizations for heart failure) for separate ischemia phenotypes in the pooled sample. Because of the repeated events analysis, patients were removed from the risk set at each timepoint only if they died or were censored. The median observation period was 72.3 (interquartile range, 56.5-72.3) months in patients with both mental stress and conventional stress ischemia; 68.6 (interquartile range, 53.9-72.3) months in patients with mental stress ischemia only; 72.3 (interquartile range, 58.8-72.3) months in patients with conventional stress ischemia only; and 70.7 (interquartile range, 55.8-72.3) months in patients with no ischemia.

#### eTable 1

Association of ischemia provoked by mental stress and by conventional (pharmacological or exercise) stress with the primary study endpoint in the pooled sample, using the summed difference score (SDS) as a continuous variable and a cut point of  $\geq 4$  as a definition of ischemia.

#### eTable 2

Association of ischemia phenotypes with the primary and the secondary endpoints in the pooled sample.

**eFigure 1**

Flow chart for cohort construction.

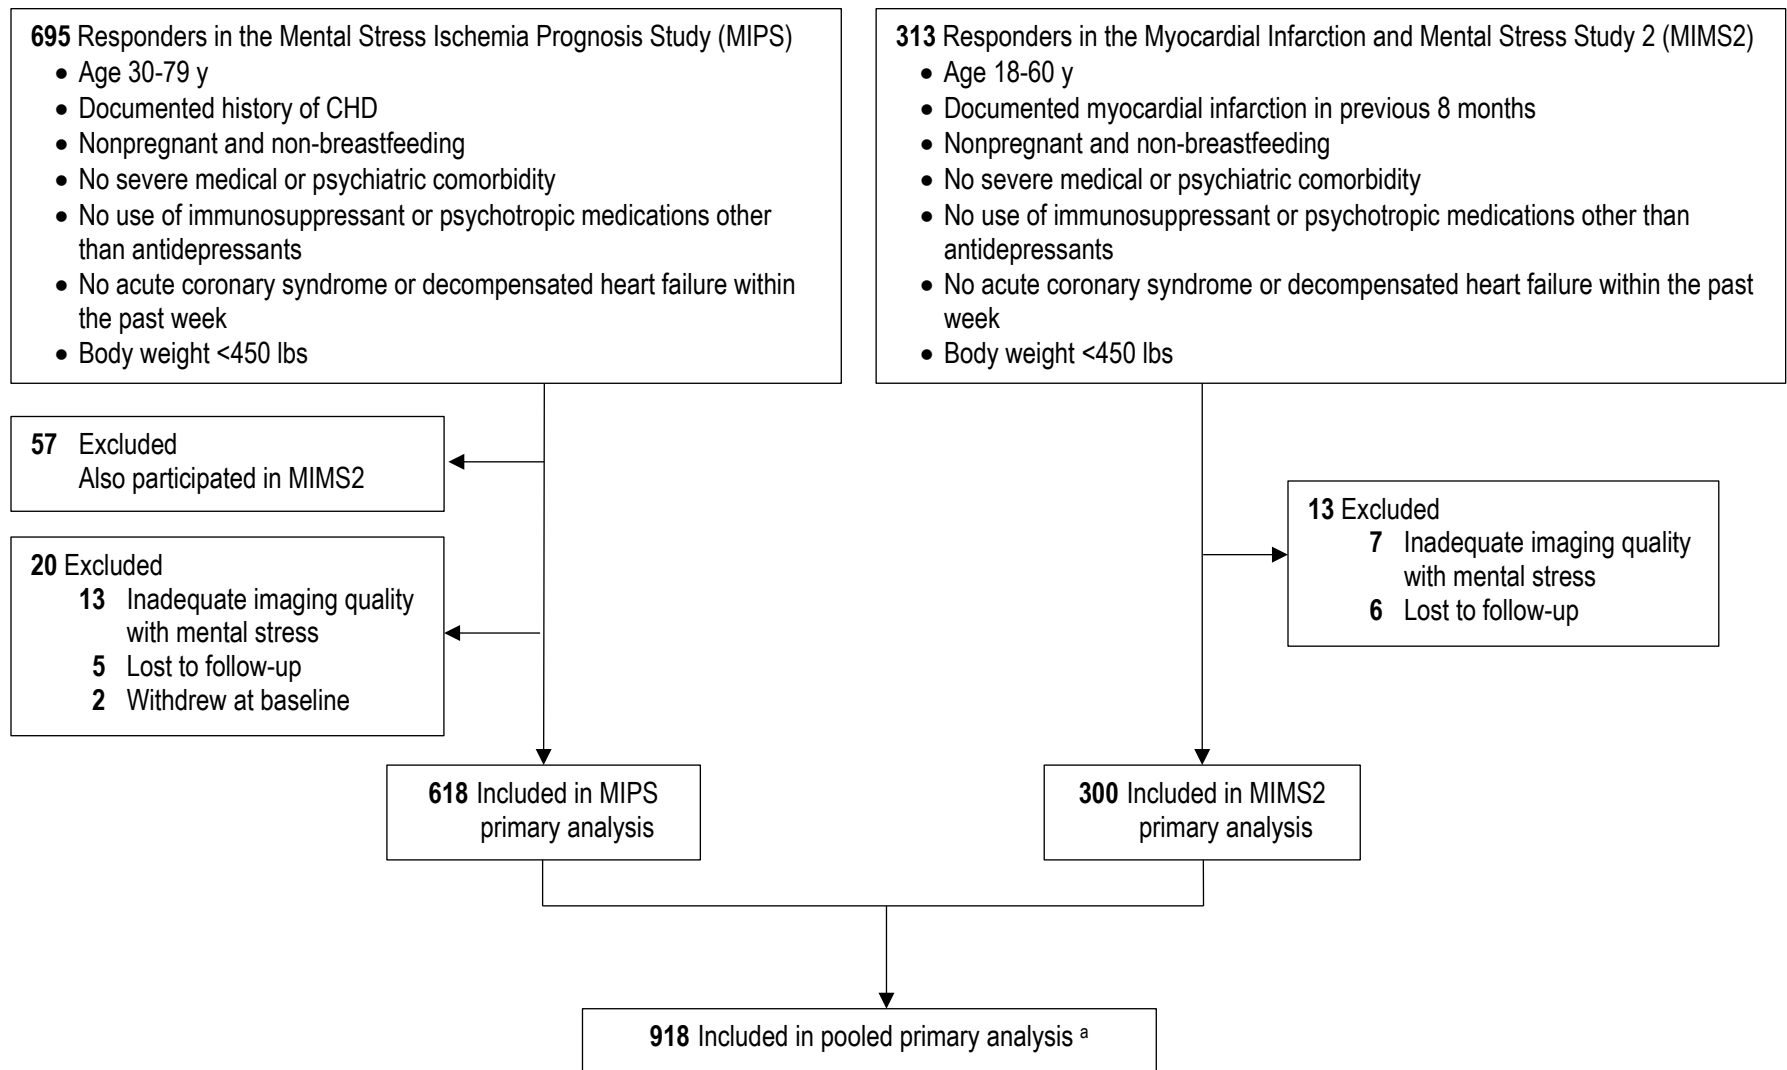

<sup>a</sup> 19 patients with inadequate imaging quality with conventional stress where further excluded in analyses of conventional stress (N=899)

**eFigure 2**

Distribution of first and subsequent events for each of the study endpoints in the two study populations, by mental stress-induced myocardial ischemia (MSI) status.

### Mental Stress Ischemia Prognosis Study

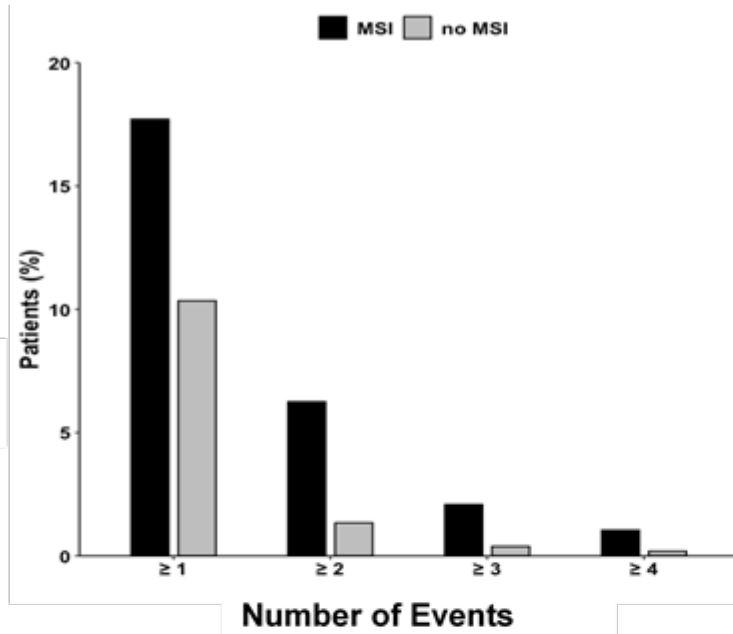

Cardiovascular  
Death or MI

### Myocardial Infarction and Mental Stress Study 2

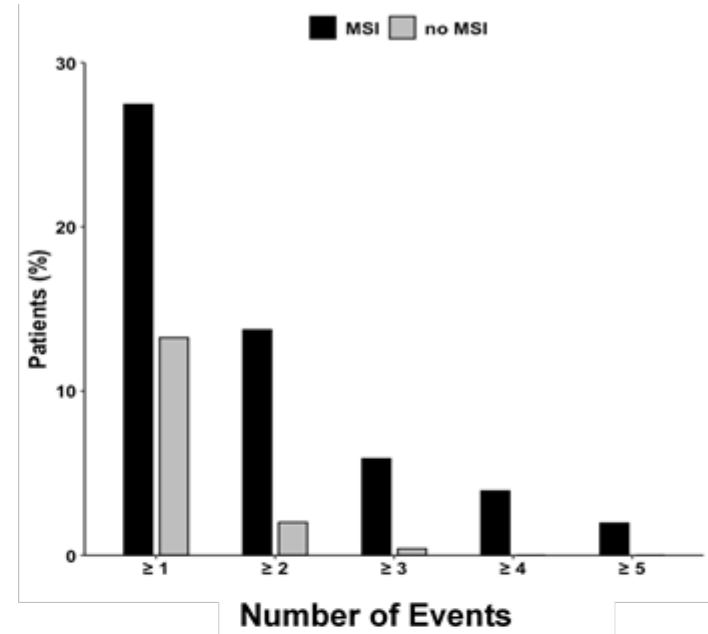

Cardiovascular  
Death, MI or  
Heart Failure

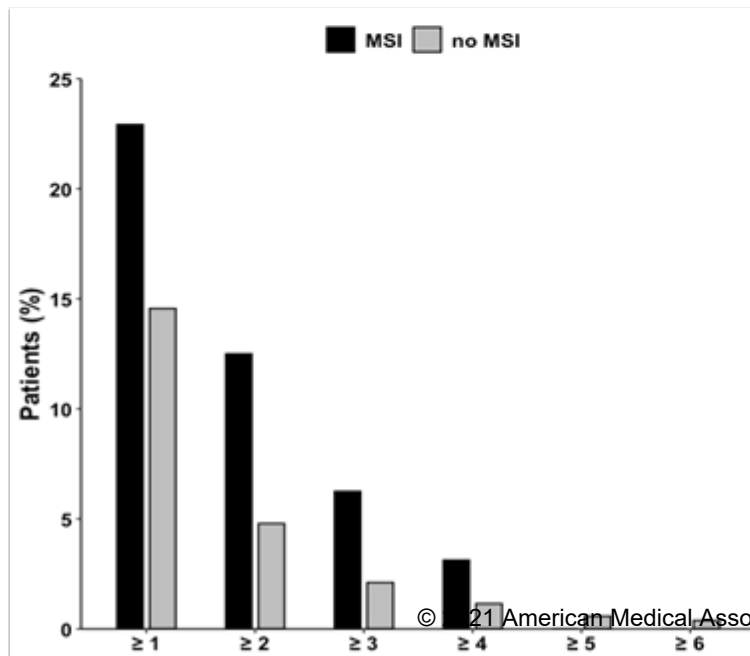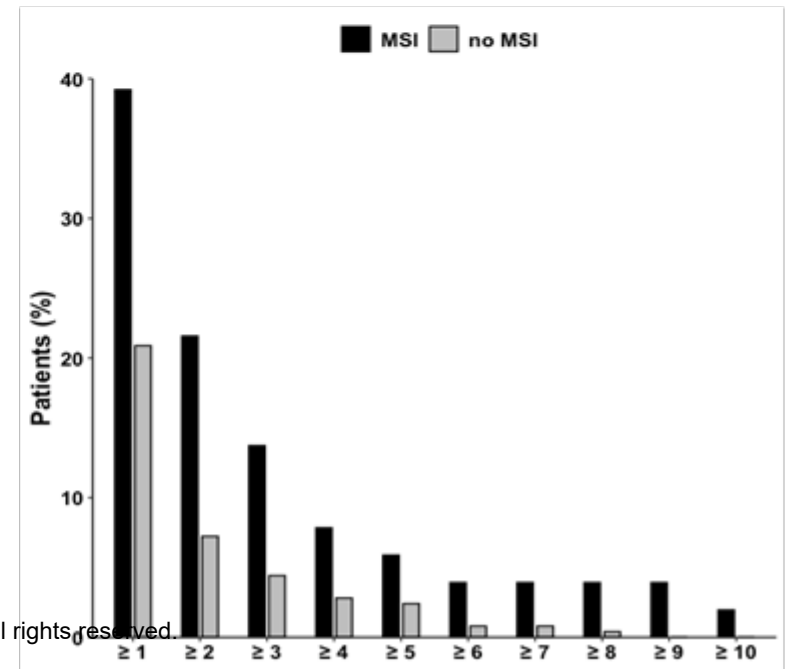

**eFigure 3**

Cumulative incidence of the secondary study endpoint (cardiovascular death, MI, or hospitalizations for heart failure) in each of the two study populations, by mental stress-induced myocardial ischemia (MSI) status. Because of the repeated events analysis, patients were removed from the risk set at each timepoint only if they died or were censored.

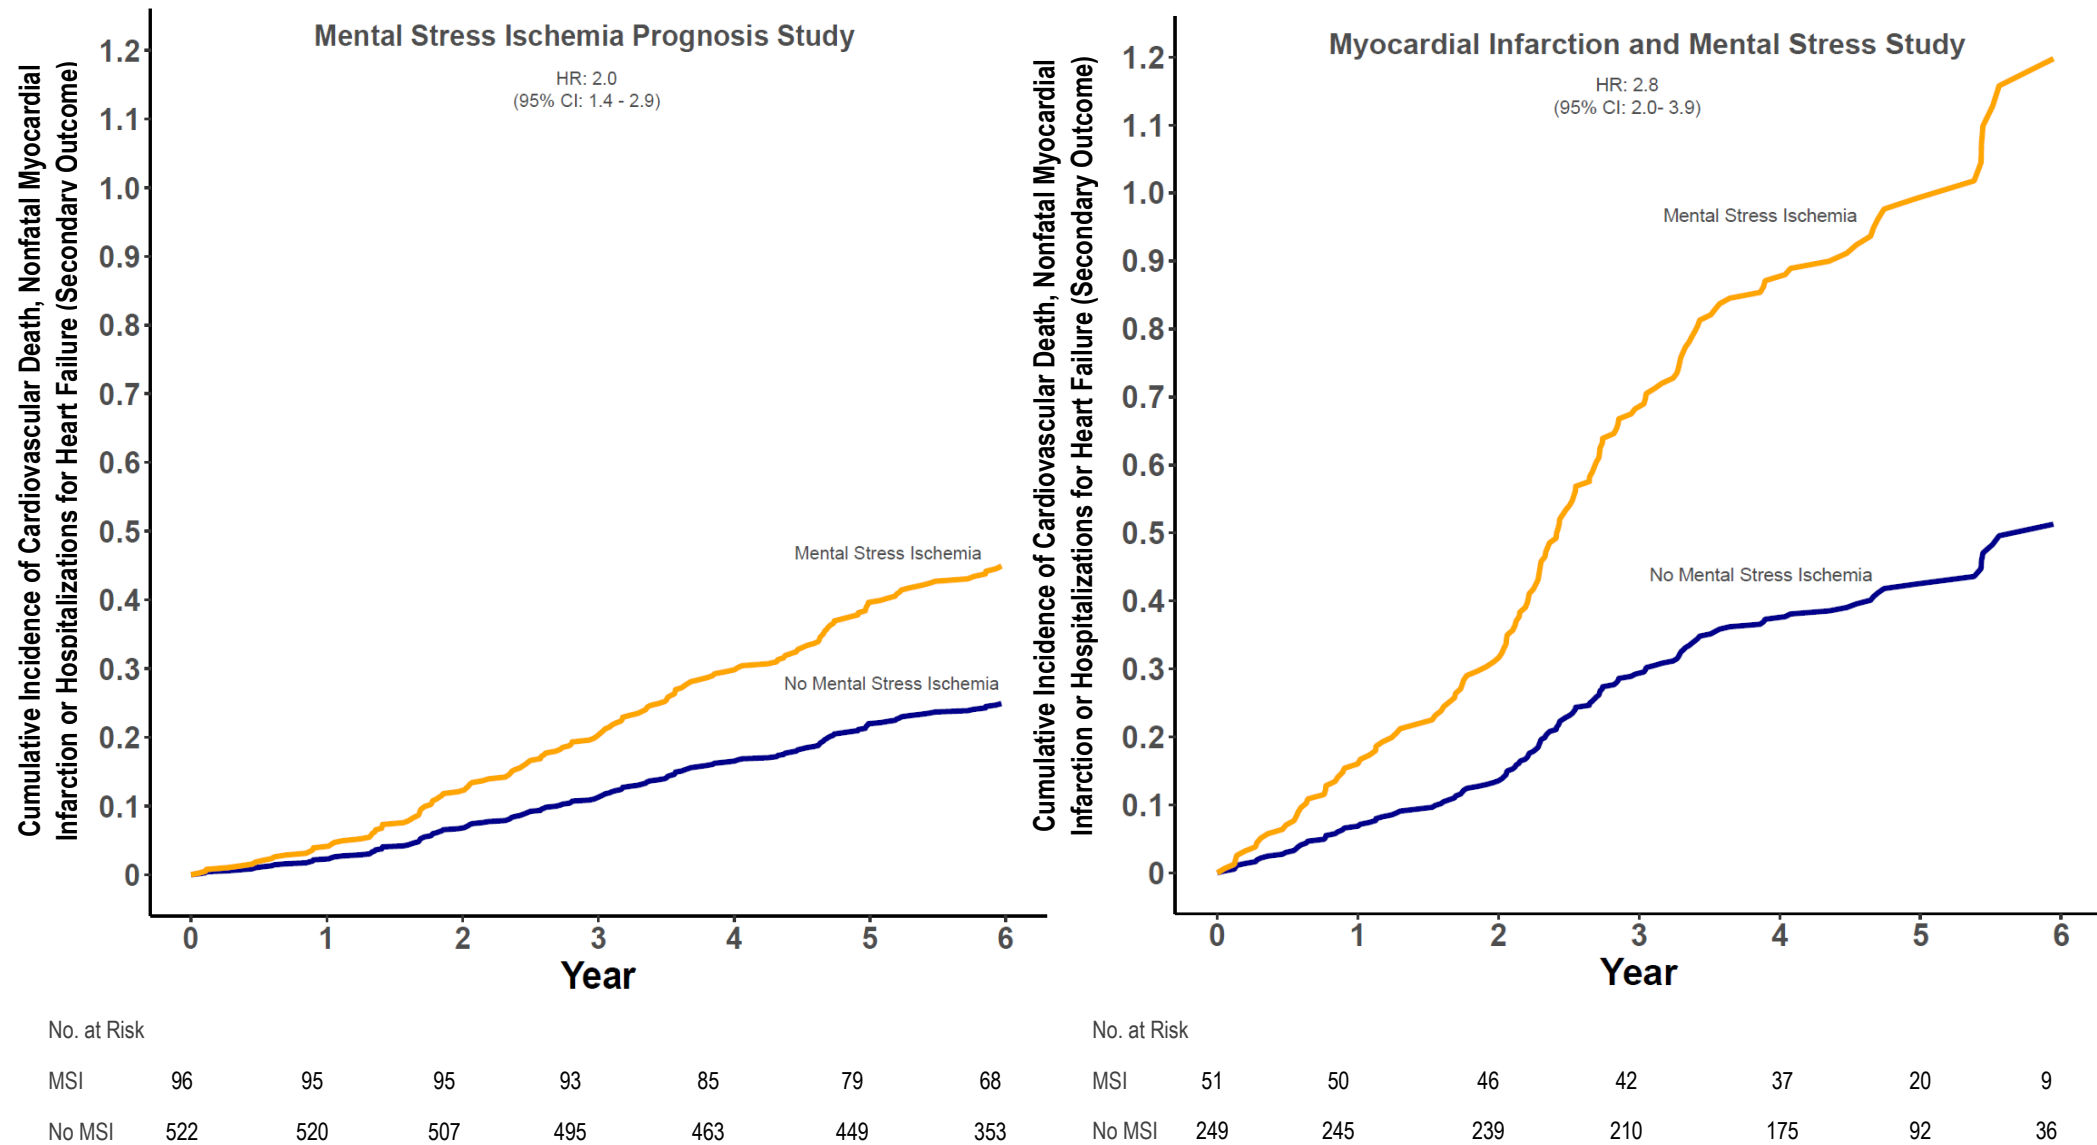

**eFigure 4**  
Pooled estimates and plots for the association of mental stress induced myocardial ischemia with the secondary endpoint of cardiovascular death, MI, or hospitalizations for heart failure, overall and in subgroups.

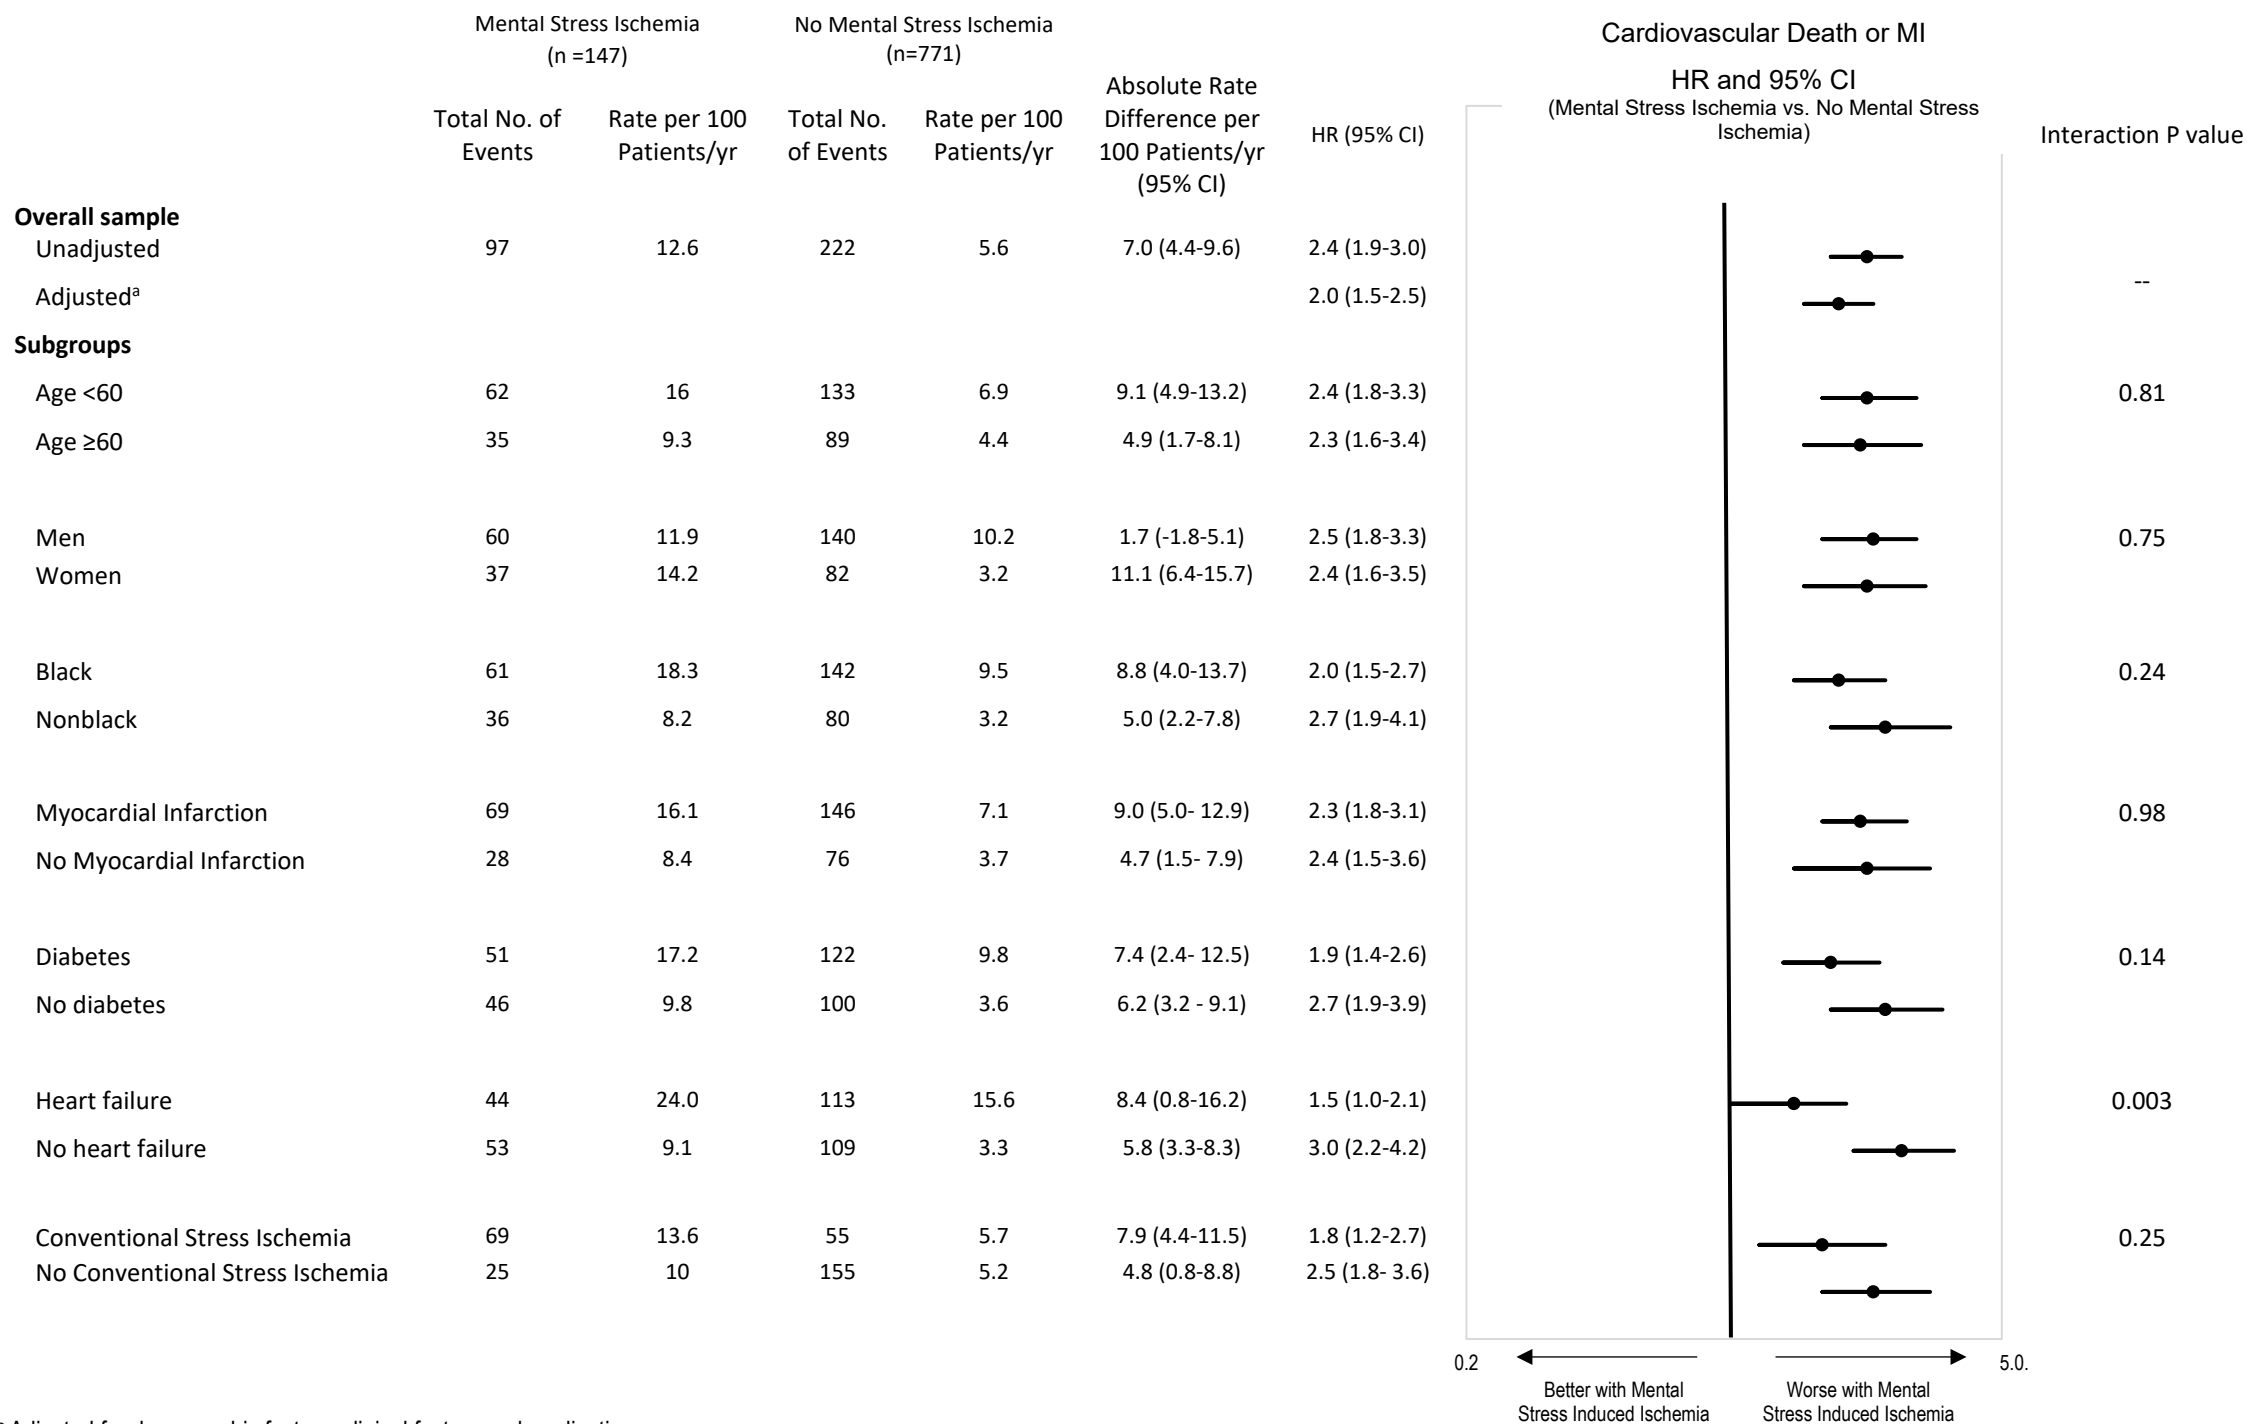

<sup>a</sup> Adjusted for demographic factors, clinical factors and medications.

**eFigure 5**

Cumulative incidence of the secondary study endpoint (cardiovascular death, MI, or hospitalizations for heart failure), for separate ischemia phenotypes in the pooled sample. Because of the repeated events analysis, patients were removed from the risk set at each timepoint only if they died or were censored.

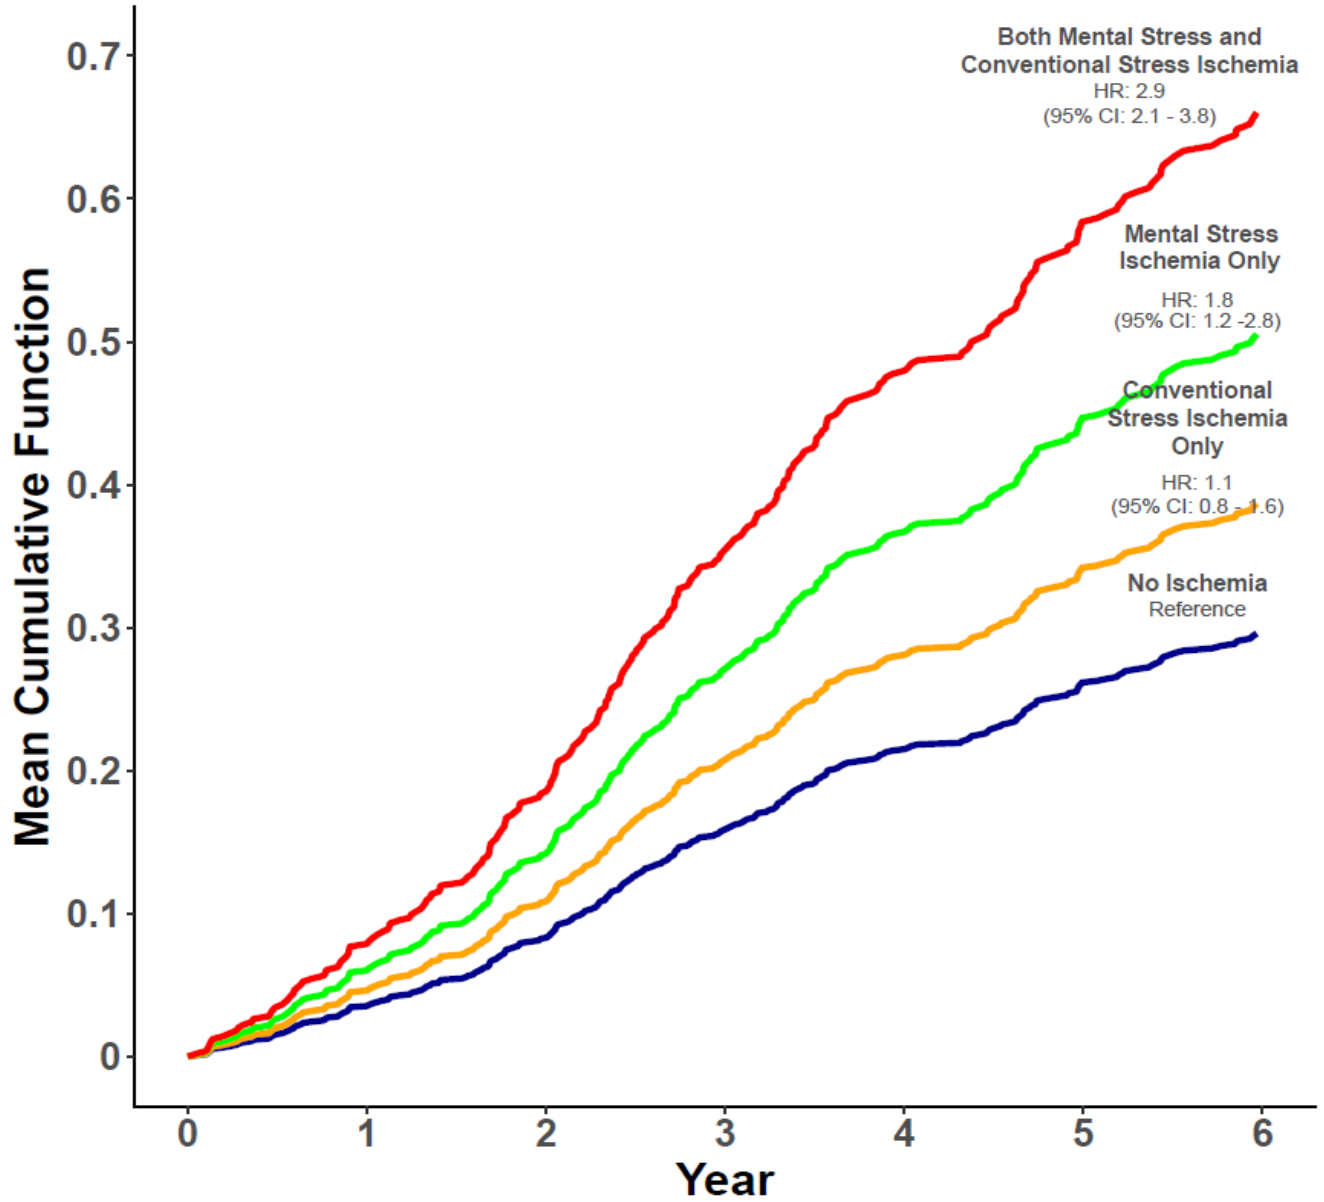

No. at Risk

|                                                     |     |     |     |     |     |     |     |
|-----------------------------------------------------|-----|-----|-----|-----|-----|-----|-----|
| Both Mental Stress and Conventional Stress Ischemia | 96  | 95  | 91  | 88  | 79  | 67  | 56  |
| Mental Stress Ischemia Only                         | 49  | 48  | 47  | 45  | 41  | 30  | 19  |
| Conventional Stress Ischemia Only                   | 185 | 184 | 180 | 172 | 158 | 137 | 102 |
| No Ischemia                                         | 569 | 564 | 549 | 518 | 469 | 396 | 280 |

**eTable 1**

Association of ischemia provoked by mental stress and by conventional (pharmacological or exercise) stress with the primary study endpoint in the pooled sample, using the summed difference score as a continuous variable and a cut point of  $\geq 4$  as a definition of ischemia.

|                                                                 | CVD death or MI                                      |                             |
|-----------------------------------------------------------------|------------------------------------------------------|-----------------------------|
|                                                                 | Summed Difference Score, Per<br>Score Point Increase | SDS $\geq 4$<br>HR (95% CI) |
| <b>Mental Stress Test (n=918)</b>                               |                                                      |                             |
| Unadjusted                                                      | 1.15 (1.09, 1.21)                                    | 2.48 (1.69, 3.64)           |
| Adjusted for demographic and clinical risk factors <sup>a</sup> | 1.14 (1.08, 1.21)                                    | 2.29 (1.55, 3.38)           |
| <b>Conventional Stress Test (n=899)</b>                         |                                                      |                             |
| Unadjusted                                                      | 1.07 (1.04, 1.10)                                    | 1.95 (1.40, 2.70)           |
| Adjusted for demographic and clinical risk factors <sup>a</sup> | 1.07 (1.04, 1.10)                                    | 1.84 (1.32, 2.57)           |

<sup>a</sup> 4 patients were excluded due to missing values.

Demographic and clinical risk factors adjusted for in these models are the same as in models of Table 2.

Abbreviations:

SDS: Summed difference score

HR: Hazards ratio

CI: Confidence interval

CVD: cardiovascular disease

MI: Myocardial infarction



**eTable 2**

Association of ischemia phenotypes with the primary and the secondary endpoints in the pooled sample.

| Ischemia Phenotype | Primary Outcome (CV Death/MI) |                         |                | Secondary Outcome (CV Death/MI/HF) |                         |                |
|--------------------|-------------------------------|-------------------------|----------------|------------------------------------|-------------------------|----------------|
|                    | Total No. of Events           | Rate per 100 Patient/yr | HR (95%CI)     | Total No. of Events                | Rate per 100 Patient/yr | HR (95%CI)     |
| No Ischemia        | 68                            | 2.3                     | reference      | 155                                | 5.3                     | reference      |
| Only CSI           | 30                            | 3.1                     | 1.4 (0.9, 2.1) | 55                                 | 5.6                     | 1.1 (0.8, 1.6) |
| Only MSI           | 12                            | 4.8                     | 2.0 (1.1, 3.7) | 25                                 | 10.0                    | 1.8 (1.2, 2.8) |
| Both MSI and CSI   | 41                            | 8.1                     | 3.8 (2.6, 5.6) | 69                                 | 13.7                    | 2.9 (2.1, 3.8) |

Abbreviations:

MSI: Mental stress-induced myocardial ischemia

CSI: Conventional stress-induced ischemia
